# Supplementary material for: Early Social Enrichment Modulates Tumor Progression and p53 Expression in Adult Mice
Source: MDPI journal article supplement (doi:10.3390/biom12040532), 2022-03-31
Supplement: s1 [file s1]

# Supplementary Figures

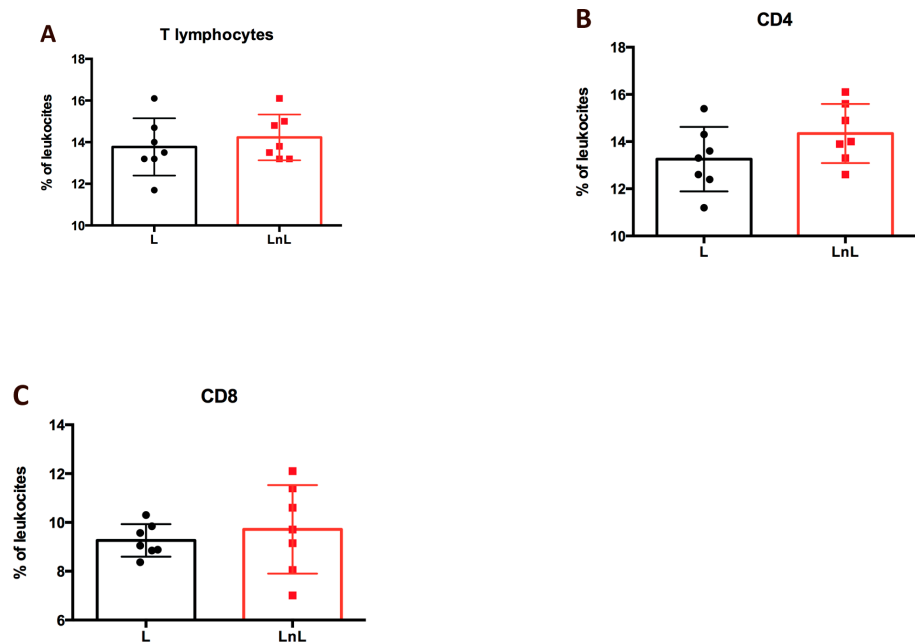

**Figure S1.** LnL condition has no impact on basal lymphocytes levels assessed in 2-months old mice. Graphs report the percentage of leukocytes (mean±SEM) classified as (A) T lymphocytes ( $t_{(12)}=0.686$ ,  $p=0.505$ , n.s.), (B) CD4+ T lymphocytes ( $t_{(12)}=1.550$ ,  $p=0.147$ , n.s.) and (C) CD8+ T lymphocytes ( $t_{(12)}=0.618$ ,  $p=0.547$ , n.s.).

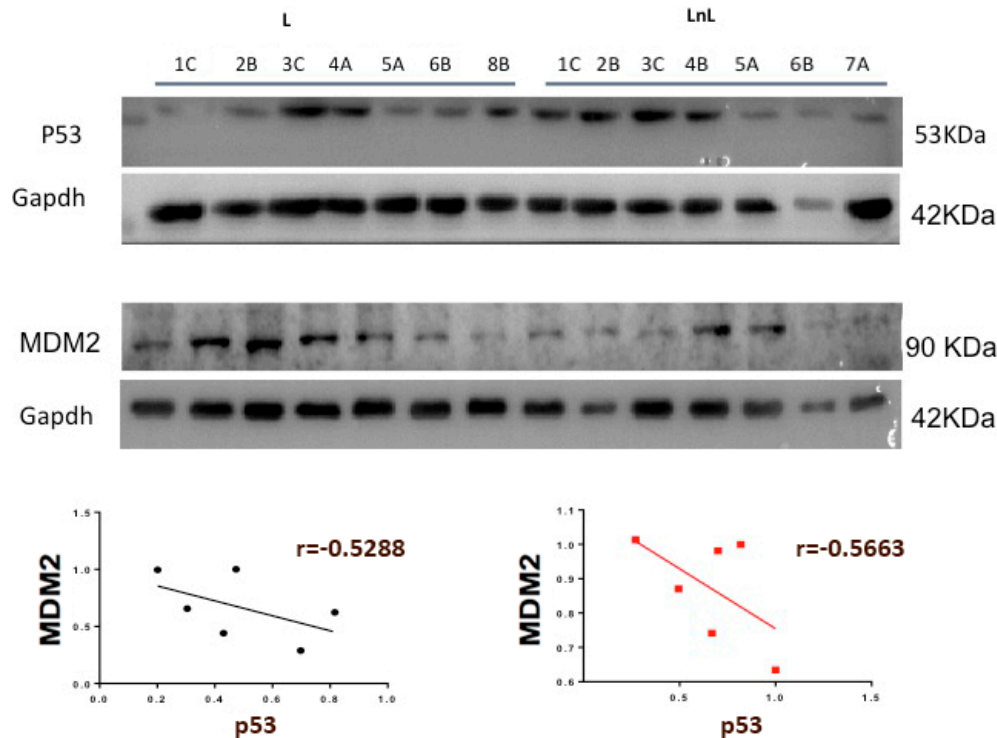

**Figure S2.** Negative correlation between Mdm2 and p53. (Top) WB analysis of indicated protein levels in muscles derived from animals of L and LnL groups, GAPDH was used as loading control. (Bottom) Graphs reporting a negative correlation between p53 and Mdm2 proteins levels in L and LnL groups. The relationships were compared between each pair of variables by Pearson correlation coefficient (confidence interval 95%), p-value of <0.05 considered as significant.

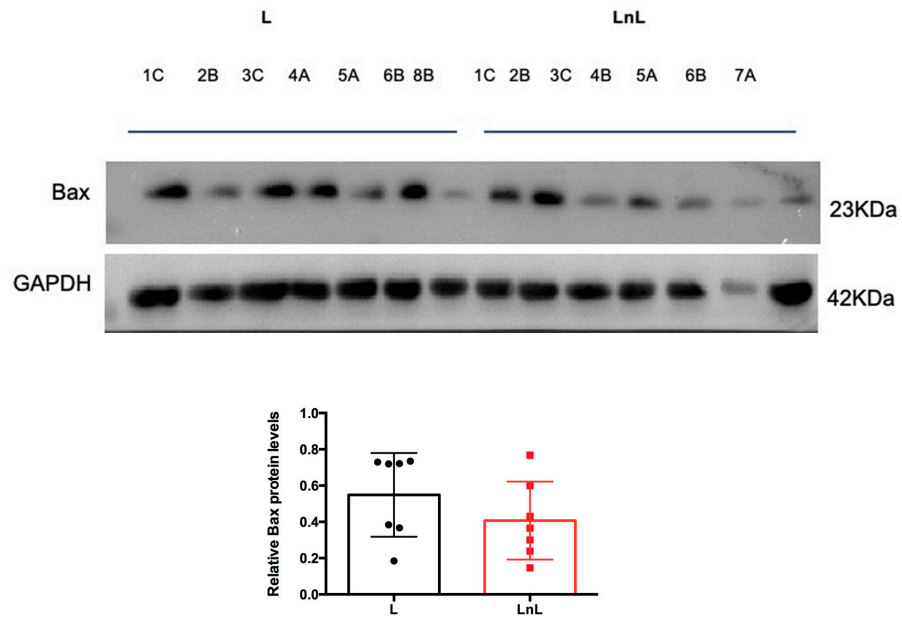

**Figure S3.** Unaltered Bax levels. **(Top)** WB analysis of indicated protein levels in muscles derived from animals of L and LnL groups, GAPDH was used as loading control. **(Bottom)** Grph reporting densitometric analysis of Bax relative to GAPDH levels (mean±SD) in indicated groups (two-tailed unpaired t-test:  $t_{(12)}=1.190$ ,  $p=0.257$ , n.s.;  $n=7$ /group).

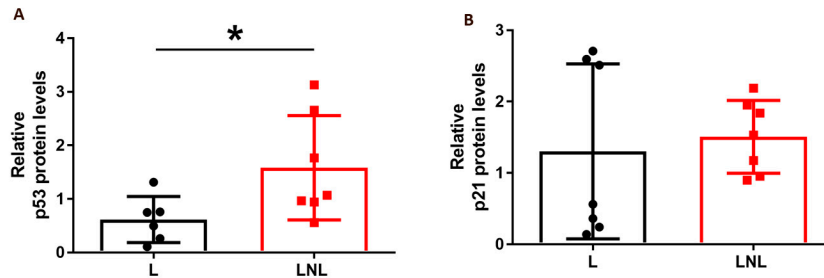

**Figure S4.** P53 levels are increased in fibrosarcoma of LnL animals. **(A)** Densitometric analysis of p53 relative to GAPDH levels (mean±SD) in indicated groups ( $t_{(11)}=2.247$ ,  $p=0.0461$ , two-tailed unpaired t-test  $n=7$ ,  $*p<0.05$ ). **(B)** Densitometric analysis of p21 relative to GAPDH levels (mean±SD) in indicated groups (n.s., two-tailed unpaired t-test  $n=7$ ). Note: these data include samples expressing both mutated and wild type p53 (see Figure 7).
